# Supplementary material for: Rheumatic immune-related adverse events associated with immune checkpoint inhibitors compared with placebo in oncologic patients: a systemic review and meta-analysis
Source: PubMed Central journal article supplement — Ther Adv Chronic Dis. 2021 Feb 12;12:2040622320976996. doi: 10.1177/2040622320976996 (PMC7887685; doi:10.1177/2040622320976996), 2021-02-12
Supplement: sj-pdf-7-taj-10.1177_2040622320976996.pdf [file sj-pdf-7-taj-10.1177_2040622320976996.pdf]

---

|    |                                                                                                                                                                                                                                                                                                                                                                                                                                                                                                                                                                                                                                           |           |
|----|-------------------------------------------------------------------------------------------------------------------------------------------------------------------------------------------------------------------------------------------------------------------------------------------------------------------------------------------------------------------------------------------------------------------------------------------------------------------------------------------------------------------------------------------------------------------------------------------------------------------------------------------|-----------|
| 3* | ((((((("randomized controlled trial"[Publication Type] OR "controlled clinical trial"[Publication Type]) OR "randomized"[Title/Abstract]) OR "placebo"[Title/Abstract]) OR "randomly"[Title/Abstract]) OR "trial"[Title]) OR "GROUPS"[Title/Abstract]) OR "clinical trials as topic"[MeSH Terms])                                                                                                                                                                                                                                                                                                                                         | 3,003,589 |
| 1  | Search (((((((((((((((((((Neoplasia[Title/Abstract]) OR Neoplasias[Title/Abstract]) OR Neoplasm[Title/Abstract]) OR Tumors[Title/Abstract]) OR Tumor[Title/Abstract]) OR Cancer[Title/Abstract]) OR Cancers[Title/Abstract]) OR Malignancy[Title/Abstract]) OR Malignancies[Title/Abstract]) OR Malignant Neoplasms[Title/Abstract]) OR Malignant Neoplasm[Title/Abstract]) OR Neoplasm, Malignant[Title/Abstract]) OR Neoplasms, Malignant[Title/Abstract]) OR Benign Neoplasms[Title/Abstract]) OR Neoplasms, Benign[Title/Abstract]) OR Benign Neoplasm[Title/Abstract]) OR Neoplasm, Benign[Title/Abstract])))) OR "Neoplasms" [Mesh] | 3,308,290 |

---

\* Cochrane RCT filter
